# Supplementary material for: Towards direct enzyme wiring: a theoretical investigation of charge carrier transfer mechanisms between glucose oxidase and organic semiconductors
Source: Royal Society of Chemistry journal article supplement (doi:10.1039/c8cp07233g), 2019-01-01
Supplement: c8cp07233g1.pdf [file c8cp07233g1.pdf]

**Supplementary Information to**  
**Towards Direct Enzyme Wiring: a Theoretical Investigation of Charge**  
**Carriers Transfer Mechanisms between Glucose Oxidase and Organic**  
**Semiconductors**

Gintautas Bagdžiūnas<sup>a,b,\*</sup>, Arūnas Ramanavičius<sup>a,b</sup>

*<sup>a</sup>Department of Material Science and Electrical Engineering, Laboratory of Nanotechnology,  
Center for Physical Sciences and Technology, Saulėtekio av. 3, Vilnius, LT-10257, Lithuania*

*<sup>b</sup>Department of Physical Chemistry, Vilnius University, Faculty of Chemistry and Geosciences,  
Naugarduko str. 24, Vilnius, Lithuania*

*E-mail: [gintautas.bagdziunas@ftmc.lt](mailto:gintautas.bagdziunas@ftmc.lt)*

*G. Bagdžiūnas: ORCID ID: [orcid.org/0000-0002-9924-6902](https://orcid.org/0000-0002-9924-6902)*

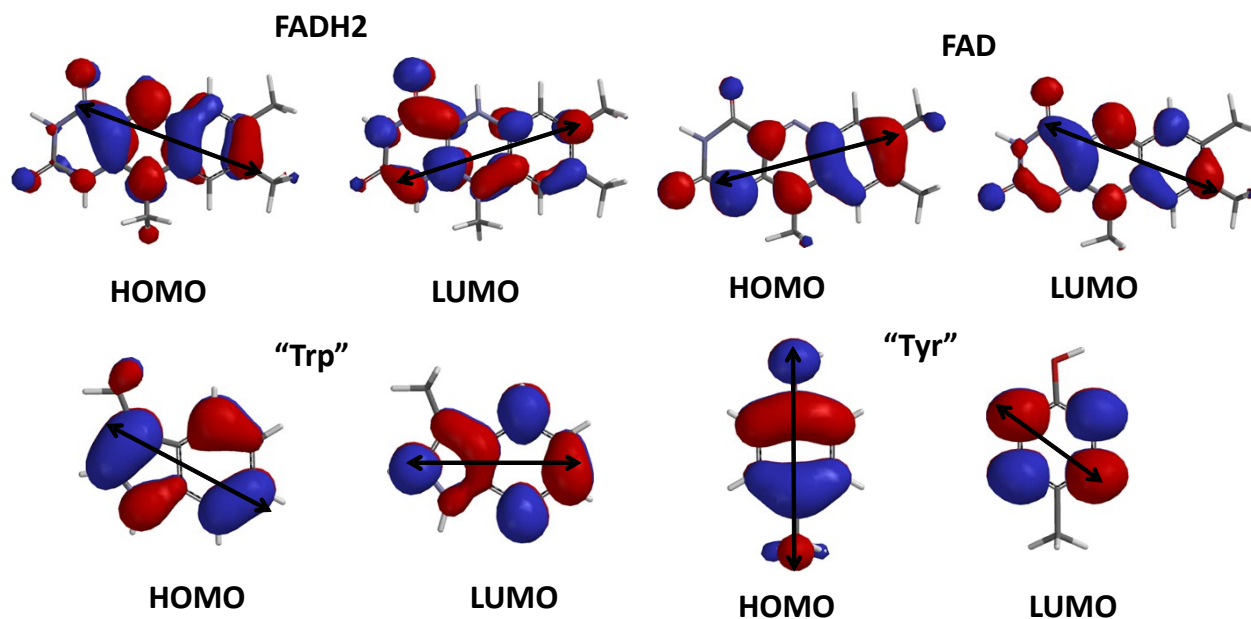

**Figure S1.** Oscillator (symmetry) vectors of HOMO and LUMO of the redox-able moieties.

**Table S1.** Orientation descriptors  $\alpha$  and  $\theta$  of redox-able moieties in enzyme.

| Entry | Pathway                         | $\alpha$ from<br>HOMO/ deg. | $\theta$ from<br>HOMO/ deg | $\alpha$ from<br>LUMO/ deg | $\theta$ from<br>LUMO/ deg |
|-------|---------------------------------|-----------------------------|----------------------------|----------------------------|----------------------------|
| 1     | FADH <sub>2</sub> -Trp(426)     | -12.1                       | 148                        | -82.3                      | 148                        |
| 2     | Trp(426)-Trp(122)               | 5.8                         | 106                        | 71.1                       | 106                        |
| 3     | Trp(122)-Trp(131)               | 26.8                        | 155                        | 30.2                       | 155                        |
| 4     | Trp(131) $\rightarrow$ Tyr(139) | -111                        | 117                        | 163                        | 117                        |

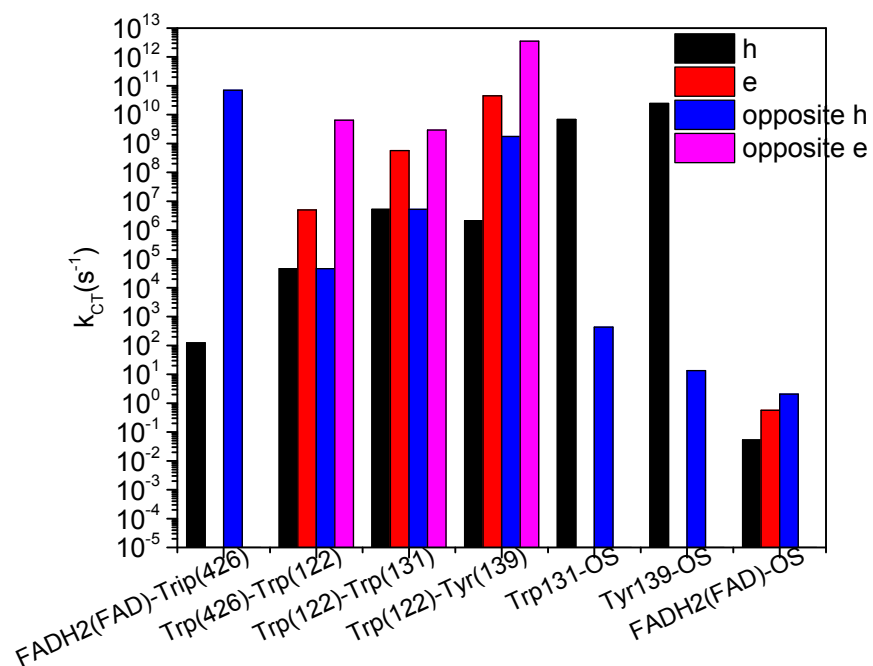

**Figure S2.** Rate constants calculated at optimal values of IP= 5 eV and EA = 4 eV.

### Details of DFT computations

The geometries of redox-able residues were optimized by using the B3LYP functional and 6-31+G(d) basis set followed by calculations of their harmonic vibrational frequencies to verify their stability. All the calculated vibrational frequencies are real, which indicates the true minimum of total energy on a potential energy hypersurface. For the DFT calculations, the Spartan'14 software at temperature of 298 K was used.

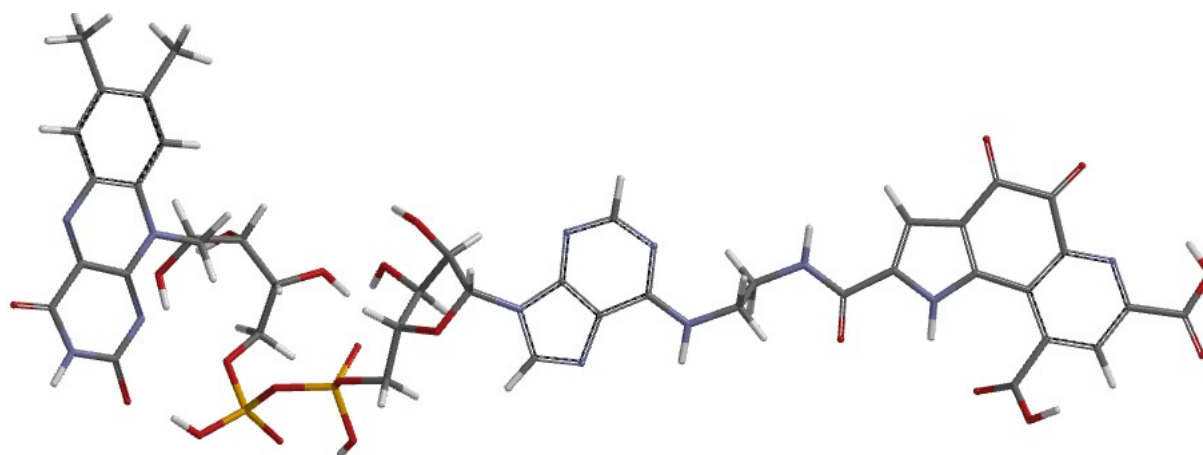

**Figure S3.** Optimised structure of Willner's covalently connected PQQ and flavin adenine dinucleotide adduct.

### Coordinates

Coordinates of all calculated system with active FAD form:

|   |           |           |           |
|---|-----------|-----------|-----------|
| C | -6.844229 | -0.098872 | -7.101192 |
| C | -6.347474 | -0.796525 | -8.183479 |
| C | -6.870139 | -1.018608 | -6.007693 |
| N | -6.089705 | -2.089944 | -7.812871 |
| C | -6.353058 | -2.247279 | -6.476829 |
| C | -7.235411 | -0.926532 | -4.668871 |
| C | -6.232798 | -3.361934 | -5.655920 |
| C | -7.115142 | -2.029716 | -3.843791 |
| C | -6.617181 | -3.249933 | -4.346452 |
| C | 9.320671  | -0.459201 | 3.602480  |
| C | 9.549167  | 0.882097  | 3.464211  |
| C | 7.899712  | -0.624748 | 3.663789  |
| N | 8.343811  | 1.559015  | 3.431500  |
| C | 7.325893  | 0.657698  | 3.544249  |
| C | 7.053613  | -1.723872 | 3.798091  |
| C | 5.935306  | 0.870946  | 3.561045  |
| C | 5.678165  | -1.526853 | 3.813703  |

|   |            |            |           |
|---|------------|------------|-----------|
| C | 5.141445   | -0.227915  | 3.693331  |
| C | 8.410962   | -6.258216  | 4.783605  |
| C | 8.828320   | -7.033339  | 5.821421  |
| C | 6.976457   | -6.235418  | 4.849338  |
| N | 7.744455   | -7.530357  | 6.506302  |
| C | 6.593603   | -7.064381  | 5.913911  |
| C | 5.983787   | -5.641130  | 4.054570  |
| C | 5.261586   | -7.294915  | 6.252563  |
| C | 4.659085   | -5.873472  | 4.389073  |
| C | 4.306599   | -6.689994  | 5.473795  |
| C | 8.361214   | -3.394777  | -6.438004 |
| C | 8.509065   | -4.049505  | -7.619977 |
| C | 7.111618   | -2.694884  | -6.522793 |
| N | 7.441460   | -3.785900  | -8.449251 |
| C | 6.581302   | -2.933345  | -7.801923 |
| C | 6.421407   | -1.845855  | -5.648866 |
| C | 5.379827   | -2.372747  | -8.236349 |
| C | 5.238676   | -1.279691  | -6.085450 |
| C | 4.724830   | -1.545959  | -7.358136 |
| C | -11.398967 | -9.104366  | 2.350063  |
| C | -11.194220 | -7.845250  | 1.877341  |
| C | -10.363946 | -9.915509  | 1.771450  |
| N | -10.102662 | -7.812380  | 1.048986  |
| C | -9.576111  | -9.075344  | 0.967587  |
| C | -10.040872 | -11.276536 | 1.860623  |
| C | -8.467799  | -9.542084  | 0.253174  |
| C | -8.936101  | -11.732558 | 1.163489  |
| C | -8.168177  | -10.871960 | 0.375628  |
| C | 12.788978  | 7.581519   | -1.549803 |
| C | 13.578471  | 6.466756   | -1.412578 |
| C | 11.645040  | 7.358986   | -0.703667 |

|   |            |            |           |
|---|------------|------------|-----------|
| N | 13.003341  | 5.591922   | -0.532686 |
| C | 11.823047  | 6.111170   | -0.075951 |
| C | 10.501764  | 8.112235   | -0.408438 |
| C | 10.886921  | 5.580941   | 0.809806  |
| C | 9.567543   | 7.569220   | 0.459019  |
| C | 9.774481   | 6.328466   | 1.082843  |
| C | -7.364662  | 1.340869   | -7.117271 |
| H | -6.638903  | 1.986029   | -7.625463 |
| H | -7.505817  | 1.689830   | -6.087942 |
| H | -8.321828  | 1.377417   | -7.649918 |
| C | -12.511848 | -9.572381  | 3.291562  |
| H | -13.048125 | -8.701188  | 3.684813  |
| H | -12.073973 | -10.137451 | 4.122331  |
| H | -13.210128 | -10.213544 | 2.741533  |
| C | 9.283395   | -5.513950  | 3.769263  |
| H | 9.266129   | -4.440654  | 3.990517  |
| H | 8.895327   | -5.684916  | 2.758624  |
| H | 10.313280  | -5.883481  | 3.832507  |
| C | 10.367471  | -1.573189  | 3.687341  |
| H | 11.327979  | -1.201240  | 3.312783  |
| H | 10.043734  | -2.425796  | 3.079498  |
| H | 10.480073  | -1.890006  | 4.730492  |
| C | 9.292385   | -3.445793  | -5.223805 |
| H | 9.983566   | -2.595881  | -5.257509 |
| H | 9.862861   | -4.381481  | -5.239964 |
| H | 8.697327   | -3.396536  | -4.304732 |
| C | 13.030406  | 8.812317   | -2.427760 |
| H | 13.926326  | 9.339145   | -2.079915 |
| H | 12.165052  | 9.481891   | -2.364131 |
| H | 13.172673  | 8.497010   | -3.467740 |
| H | -6.184502  | -0.380323  | -9.184196 |

|   |            |            |           |
|---|------------|------------|-----------|
| H | -7.618080  | 0.019152   | -4.268295 |
| H | -7.409171  | -1.955325  | -2.790591 |
| H | -6.537061  | -4.117713  | -3.681806 |
| H | -5.839960  | -4.307467  | -6.046896 |
| H | 8.234461   | 2.560821   | 3.338912  |
| H | 5.509605   | 1.876927   | 3.471625  |
| H | 4.053130   | -0.099038  | 3.706648  |
| H | 5.006129   | -2.386062  | 3.920208  |
| H | 7.468995   | -2.733888  | 3.890506  |
| H | 10.350283  | 9.103356   | -0.851100 |
| H | 8.643643   | 8.122270   | 0.663372  |
| H | 9.034094   | 5.953609   | 1.798753  |
| H | 11.036952  | 4.598493   | 1.271869  |
| H | 14.529581  | 6.302161   | -1.931727 |
| H | 10.537721  | 1.349586   | 3.390509  |
| H | 3.867308   | -5.407705  | 3.791271  |
| H | 3.246872   | -6.848273  | 5.704322  |
| H | 4.988707   | -7.930702  | 7.102580  |
| H | 6.248055   | -5.012939  | 3.196226  |
| H | 9.875937   | -7.232471  | 6.074525  |
| H | 7.786486   | -8.139066  | 7.313675  |
| H | 13.391398  | 4.697601   | -0.261120 |
| H | -10.646627 | -11.960631 | 2.465843  |
| H | -8.657903  | -12.790521 | 1.230843  |
| H | -7.300377  | -11.273317 | -0.160144 |
| H | -7.867491  | -8.874225  | -0.375166 |
| H | -11.816039 | -6.977262  | 2.124639  |
| H | -9.745013  | -6.992204  | 0.576183  |
| H | 4.690173   | -0.605534  | -5.417712 |
| H | 6.808847   | -1.635930  | -4.645354 |
| H | 3.778131   | -1.084318  | -7.661230 |

|   |            |           |           |
|---|------------|-----------|-----------|
| H | 4.977228   | -2.583064 | -9.233794 |
| H | 7.312313   | -4.158712 | -9.381172 |
| H | 9.356820   | -4.695044 | -7.876507 |
| H | -5.755784  | -2.818213 | -8.431148 |
| H | -8.307879  | 6.699252  | 4.945587  |
| C | -8.858794  | 7.309366  | 4.240370  |
| C | -10.304815 | 8.908823  | 2.478559  |
| C | -8.661877  | 7.145021  | 2.859433  |
| C | -9.757841  | 8.251778  | 4.733648  |
| C | -10.500366 | 9.073612  | 3.838838  |
| C | -9.399867  | 7.960396  | 1.962937  |
| H | -10.846470 | 9.509880  | 1.755181  |
| N | -7.774637  | 6.217725  | 2.333211  |
| N | -9.260956  | 7.854760  | 0.604311  |
| C | -8.422479  | 6.978518  | 0.138989  |
| C | -8.267004  | 6.857152  | -1.347703 |
| O | -8.879987  | 7.526717  | -2.158175 |
| N | -7.344359  | 5.894028  | -1.705840 |
| H | -7.189369  | 5.759264  | -2.698129 |
| C | -6.579850  | 5.061624  | -0.853641 |
| O | -5.806120  | 4.263059  | -1.347503 |
| C | -7.606785  | 6.087289  | 0.964167  |
| C | -6.994412  | 5.355034  | 3.228218  |
| H | -6.363939  | 5.966716  | 3.879097  |
| H | -6.375431  | 4.713922  | 2.605968  |
| N | -6.757889  | 5.204603  | 0.511865  |
| C | -11.477747 | 10.100286 | 4.354285  |
| H | -11.951797 | 10.634877 | 3.528044  |
| H | -12.272406 | 9.640811  | 4.954038  |
| H | -10.987696 | 10.843390 | 4.994721  |
| C | -9.937255  | 8.394274  | 6.223597  |



|   |            |          |          |
|---|------------|----------|----------|
| H | -9.691869  | 9.408152 | 6.560700 |
| H | -10.976158 | 8.208666 | 6.520847 |
| H | -9.301214  | 7.694671 | 6.770544 |
| H | -7.667254  | 4.747581 | 3.839420 |

Coordinates of all calculated system with the active FADH<sub>2</sub> form:

|   |           |           |           |
|---|-----------|-----------|-----------|
| C | -6.782349 | -0.148537 | -7.173393 |
| C | -6.280832 | -0.857475 | -8.246108 |
| C | -6.816053 | -1.057637 | -6.071247 |
| N | -6.027505 | -2.147717 | -7.861618 |
| C | -6.298608 | -2.291692 | -6.525619 |
| C | -7.188631 | -0.952007 | -4.735443 |
| C | -6.184977 | -3.398591 | -5.693349 |
| C | -7.074995 | -2.047395 | -3.899113 |
| C | -6.576467 | -3.273285 | -4.387196 |
| C | 9.321796  | -0.434343 | 3.623702  |
| C | 9.553515  | 0.905150  | 3.473802  |
| C | 7.900216  | -0.596768 | 3.678637  |
| N | 8.349601  | 1.583862  | 3.427814  |
| C | 7.329422  | 0.685483  | 3.543533  |
| C | 7.051369  | -1.693041 | 3.818775  |
| C | 5.939155  | 0.901353  | 3.550478  |
| C | 5.676219  | -1.493438 | 3.824778  |
| C | 5.142558  | -0.194769 | 3.688891  |
| C | 8.394889  | -6.220074 | 4.855517  |
| C | 8.805021  | -6.985894 | 5.903075  |
| C | 6.960082  | -6.194095 | 4.912985  |
| N | 7.716438  | -7.474358 | 6.586625  |
| C | 6.569769  | -7.012072 | 5.983330  |
| C | 5.972959  | -5.605737 | 4.106977  |
| C | 5.235460  | -7.236964 | 6.316715  |

|   |            |            |           |
|---|------------|------------|-----------|
| C | 4.645986   | -5.832489  | 4.436270  |
| C | 4.285949   | -6.637885  | 5.526815  |
| C | 8.413093   | -3.464897  | -6.393259 |
| C | 8.566348   | -4.131254  | -7.568022 |
| C | 7.165273   | -2.763635  | -6.491789 |
| N | 7.503878   | -3.873762  | -8.405769 |
| C | 6.641678   | -3.013478  | -7.771515 |
| C | 6.471744   | -1.904994  | -5.629965 |
| C | 5.443678   | -2.454962  | -8.218050 |
| C | 5.292510   | -1.340966  | -6.078605 |
| C | 4.785297   | -1.618582  | -7.351527 |
| C | -11.406307 | -9.054367  | 2.338494  |
| C | -11.196618 | -7.800233  | 1.854820  |
| C | -10.369555 | -9.872889  | 1.773532  |
| N | -10.100389 | -7.777293  | 1.032318  |
| C | -9.575704  | -9.041915  | 0.966043  |
| C | -10.049476 | -11.233564 | 1.877622  |
| C | -8.464273  | -9.517491  | 0.262382  |
| C | -8.941663  | -11.698250 | 1.191117  |
| C | -8.167774  | -10.846655 | 0.399320  |
| C | 12.833552  | 7.550144   | -1.586276 |
| C | 13.620225  | 6.435357   | -1.433895 |
| C | 11.684498  | 7.337814   | -0.744461 |
| N | 13.038586  | 5.570070   | -0.548854 |
| C | 11.856710  | 6.095795   | -0.103766 |
| C | 10.540971  | 8.095904   | -0.462916 |
| C | 10.914680  | 5.575796   | 0.781796  |
| C | 9.600924   | 7.562940   | 0.404481  |
| C | 9.802101   | 6.327893   | 1.041379  |
| C | -7.300048  | 1.291904   | -7.206257 |
| H | -6.570281  | 1.930844   | -7.716564 |

|   |            |            |           |
|---|------------|------------|-----------|
| H | -7.446314  | 1.651025   | -6.181145 |
| H | -8.254154  | 1.325014   | -7.744589 |
| C | -12.525288 | -9.511304  | 3.278203  |
| H | -13.062158 | -8.635408  | 3.660032  |
| H | -12.093096 | -10.069113 | 4.116819  |
| H | -13.221655 | -10.156499 | 2.730471  |
| C | 9.274337   | -5.487175  | 3.838958  |
| H | 9.257800   | -4.411766  | 4.049763  |
| H | 8.891611   | -5.667190  | 2.827854  |
| H | 10.303175  | -5.857908  | 3.911531  |
| C | 10.366064  | -1.549320  | 3.725157  |
| H | 11.329330  | -1.182706  | 3.352423  |
| H | 10.044170  | -2.407172  | 3.123750  |
| H | 10.472255  | -1.856262  | 4.771927  |
| C | 9.337369   | -3.505855  | -5.173423 |
| H | 10.030282  | -2.657538  | -5.211437 |
| H | 9.906212   | -4.442668  | -5.177370 |
| H | 8.737275   | -3.446682  | -4.258217 |
| C | 13.082135  | 8.771989   | -2.474682 |
| H | 13.977060  | 9.300554   | -2.126911 |
| H | 12.217665  | 9.443681   | -2.422357 |
| H | 13.229634  | 8.446415   | -3.510762 |
| H | -6.111508  | -0.451233  | -9.249857 |
| H | -7.571802  | -0.001826  | -4.346146 |
| H | -7.374769  | -1.962329  | -2.848343 |
| H | -6.501650  | -4.134756  | -3.713783 |
| H | -5.791692  | -4.348546  | -6.072991 |
| H | 8.242604   | 2.584921   | 3.324969  |
| H | 5.515803   | 1.907180   | 3.448987  |
| H | 4.054423   | -0.063837  | 3.694865  |
| H | 5.002026   | -2.350385  | 3.935786  |

|   |            |            |           |
|---|------------|------------|-----------|
| H | 7.464379   | -2.702855  | 3.923242  |
| H | 10.393780  | 9.082978   | -0.915947 |
| H | 8.676910   | 8.119575   | 0.598315  |
| H | 9.057041   | 5.961273   | 1.756705  |
| H | 11.060328  | 4.597584   | 1.254135  |
| H | 14.573918  | 6.264073   | -1.946094 |
| H | 10.543319  | 1.370150   | 3.401142  |
| H | 3.858416   | -5.371103  | 3.829581  |
| H | 3.224662   | -6.792051  | 5.752912  |
| H | 4.956672   | -7.864038  | 7.171274  |
| H | 6.243169   | -4.986323  | 3.244115  |
| H | 9.850841   | -7.184436  | 6.163954  |
| H | 7.752842   | -8.075327  | 7.400047  |
| H | 13.423481  | 4.677723   | -0.266515 |
| H | -10.659855 | -11.910714 | 2.485998  |
| H | -8.665783  | -12.756007 | 1.270218  |
| H | -7.297730  | -11.254701 | -0.127688 |
| H | -7.859242  | -8.856790  | -0.368987 |
| H | -11.818219 | -6.928799  | 2.090255  |
| H | -9.738603  | -6.962351  | 0.553648  |
| H | 4.741519   | -0.659429  | -5.420478 |
| H | 6.853954   | -1.686090  | -4.626365 |
| H | 3.841153   | -1.158204  | -7.664356 |
| H | 5.046275   | -2.674172  | -9.215664 |
| H | 7.379259   | -4.255314  | -9.334764 |
| H | 9.414341   | -4.780741  | -7.813565 |
| H | -5.691468  | -2.882506  | -8.470969 |
| H | -8.362014  | 6.873910   | 4.880938  |
| C | -8.947873  | 7.399457   | 4.134015  |
| C | -10.397711 | 8.789822   | 2.238006  |
| C | -8.886801  | 6.996704   | 2.804061  |

|   |            |           |           |
|---|------------|-----------|-----------|
| C | -9.750832  | 8.475588  | 4.547547  |
| C | -10.489117 | 9.178142  | 3.581931  |
| C | -9.616917  | 7.710950  | 1.831070  |
| H | -10.962164 | 9.334501  | 1.484978  |
| N | -8.109263  | 5.870463  | 2.380636  |
| C | -7.955630  | 6.623737  | -1.246456 |
| O | -8.499554  | 7.279361  | -2.132561 |
| N | -6.832012  | 5.815401  | -1.517674 |
| H | -6.495560  | 5.817421  | -2.472102 |
| C | -6.091536  | 5.074971  | -0.617899 |
| O | -5.094239  | 4.434061  | -0.903066 |
| C | -7.607036  | 4.914007  | 3.348132  |
| H | -8.379065  | 4.732478  | 4.099635  |
| H | -7.402950  | 3.960677  | 2.854056  |
| N | -6.591914  | 5.128627  | 0.683426  |
| H | -6.003343  | 4.682763  | 1.370470  |
| C | -7.704624  | 5.861909  | 1.057374  |
| C | -8.393032  | 6.575825  | 0.121214  |
| N | -9.555230  | 7.282776  | 0.497572  |
| H | -9.849449  | 7.940582  | -0.214920 |
| C | -11.369060 | 10.342551 | 3.967600  |
| H | -12.149104 | 10.043295 | 4.678360  |
| H | -11.864561 | 10.770787 | 3.092537  |
| H | -10.794742 | 11.143181 | 4.449600  |
| C | -9.803649  | 8.859313  | 6.007322  |
| H | -10.820490 | 8.784742  | 6.412236  |
| H | -9.476746  | 9.893899  | 6.168410  |
| H | -9.160366  | 8.212478  | 6.610238  |
| H | -6.696715  | 5.251080  | 3.866637  |
